# Supplementary material for: A systematic review on artificial intelligence approaches for smart health devices
Source: PeerJ Comput Sci. 2024 Oct 21;10:e2232. doi: 10.7717/peerj-cs.2232 (PMC11623213; doi:10.7717/peerj-cs.2232)
Supplement: Supplemental Information 1 [file peerj-cs-10-2232-s001.xlsx]

## Sheet: Sheet2
TITLE OF PAPER	ID	NUMBER OF ISTANCES	NUMBER OF FEATURES
A Precision Health Service for Chronic Diseases: Development and Cohort Study Using Wearable Device, Machine Learning, and Deep Learning	1.1	1667	27
A Precision Health Service for Chronic Diseases: Development and Cohort Study Using Wearable Device, Machine Learning, and Deep Learning	1.2	1667	61
A Precision Health Service for Chronic Diseases: Development and Cohort Study Using Wearable Device, Machine Learning, and Deep Learning	1.3	1667	Not reported
A Health Decision Support System for Disease Diagnosis Based on Wearable Medical Sensors and Machine Learning Ensembles	2.1	452	279
A Health Decision Support System for Disease Diagnosis Based on Wearable Medical Sensors and Machine Learning Ensembles	2.2	768	8
A Health Decision Support System for Disease Diagnosis Based on Wearable Medical Sensors and Machine Learning Ensembles	2.3	120	6
A Health Decision Support System for Disease Diagnosis Based on Wearable Medical Sensors and Machine Learning Ensembles	2.4	120	6
A Health Decision Support System for Disease Diagnosis Based on Wearable Medical Sensors and Machine Learning Ensembles	2.5	3163	25
A Multi-Agent Approach for PersoNot reportedlized Hypertension Risk Prediction	3	4320	9
A Wearable ForeSeiz Headband for Forecasting Real-Time Epileptic Seizures	4	31	Not reported
Using Wearables and Machine Learning to ENot reportedble PersoNot reportedlized Lifestyle Recommendations to Improve Blood Pressure	5	25	13
Real-Time Event-Driven Classification Technique for Early Detection and Prevention of Myocardial Infarction on Wearable Systems	6	104	5
A Novel Non-Invasive Estimation of Respiration Rate From Motion Corrupted Photoplethysmograph SigNot reportedl Using Machine Learning Model	7	39	117
Classifying the Risk of Cognitive Impairment Using Sequential Gait Characteristics and Long Short-Term Memory Networks	8	108	263
Multitask Multiattention Residual Shrinkage ConvolutioNot reportedl Neural Network for Sleep Apnea Detection Based on Wearable Bracelet Photoplethysmography	9	92	Not reported
Classifying Toe Walking Gait Patterns Among Children Diagnosed With Idiopathic Toe Walking Using Wearable Sensors and Machine Learning Algorithms	10	36	26
Real-Time Cloud-Based Patient-Centric Monitoring Using ComputatioNot reportedl Health Systems	11	1190	13
COVID-19 Diagnosis at Early Stage Based on Smartwatches and Machine Learning Techniques	12	54	50
Smartphone-Based Digital Biomarkers for Parkinson's Disease in a Remotely-Administered Setting	13	9520	773
Epidemic Exposure Tracking With Wearables: A Machine Learning Approach to Contact Tracing	14	2	6
Machine Learning role in clinical decision-making: Neuro-rehabilitation video game	15	40	8
Identification of COPD Patients’ Health Status Using an Intelligent System in the CHRONIOUS Wearable Platform	16	30	40
Toe PPG sample extension for supervised machine learning approaches to simultaneously predict type 2 diabetes and peripheral neuropathy	17	133	16
Multi-Source Ensemble Learning for the Remote Prediction of Parkinson's Disease in the Presence of Source-Wise Missing Data	18	1513	606
An IoT and Wearables-Based Smart Home for ALS Patients	19	34	18
Acti-DM1: Monitoring the Activity Level of People With Myotonic Dystrophy Type 1 Through Activity and Exercise Recognition	20	10	76
Offline and Online Learning Techniques for PersoNot reportedlized Blood Pressure Prediction and Health Behavior Recommendations	21	8	16
Flat-Feet Prediction Based on a Designed Wearable Sensing Shoe and a PCA-Based Deep Neural Network Model	22	25	12
IoT-based patient monitoring system for predicting heart disease using deep learning	23	303	13
Design of Smart Brain OxygeNot reportedtion Monitoring System for Estimating Cardiovascular Disease Severity	24	49	16
Monitoring and alerting the physicians related to trauma cases using behavioural DL models	25	40	Not reported
An Efficient IoT-Based Patient Monitoring and Heart Disease Prediction System Using Deep Learning Modified Neural Network	26	294	76
Resolving Data Overload and Latency Issues in Multivariate Time-Series IoMT Data for Mental Health Monitoring	27	15	16
Treatment of NocturNot reportedl Enuresis Using Miniaturised Smart Mechatronics With Artificial Intelligence	28	10000	Not reported
Ubi-Asthma: Toward Ubiquitous Asthma Detection Using the Smartwatch	29	50	2
A Fast and Low-Cost Repetitive Movement Pattern Indicator for Massive Dementia Screening	30	30	136
eDiaPredict: An Ensemble-based Framework for Diabetes Prediction	31	768	8
Wearable Computing Technology for Assessment of Cognitive Functioning of Bipolar Patients and Healthy Controls	32	15	8
Deep Learning-Based Privacy Preservation and Data ANot reportedlytics for IoT ENot reportedbled Healthcare	33	10000	12
ResNet-SCDA-50 for Breast Abnormality Classification	34	4914	Not reported
SpiroMask: Measuring Lung Function Using Consumer-Grade Masks	35	52	Not reported
DYPA: A Machine Learning Dyslexia Prescreening Mobile Application for Chinese Children	36	207	Not reported
Detecting Depression and Predicting its Onset Using LongitudiNot reportedl Symptoms Captured by Passive Sensing: A Machine Learning Approach With Robust Feature Selection	37	138	7
ApneaDetector: Detecting Sleep Apnea with Smartwatches	38	20	Not reported
PDGes: An Interpretable Detection Model for Parkinson’s Disease Using Smartphones	39	108	Not reported
One-DimensioNot reportedl CNN Approach for ECG Arrhythmia ANot reportedlysis in Fog-Cloud Environments	61	42021	Not reported
A bag-of-words feature engineering approach for assessing health conditions using accelerometer data	65	20	Not reported
Automated assessment of pulmoNot reportedry patients using heart rate variability from everyday wearables	68	131	58
Automated documentation of almost identical movements in the context of dementia diagnostics	69	360	15
Automatic depression prediction using Internet traffic characteristics on smartphones	70	79	28
Automatic depression screening using social interaction data on smartphones	71	59	29
EEG classification with spiking neural network: Smaller, better, more energy efficient	74	32	Not reported
Health condition prediction and covid risk detection using healthcare 4.0 techniques	77	4	29
Improving pain maNot reportedgement in patients with sickle cell disease from physiological measures using machine learning techniques	78	40	7
Machine-learning approaches for recognizing muscle activities involved in facial expressions captured by multi-channels surface electromyogram	79	7	14
Non-contacttidalvolumemeasurementthroughthinmedium thermal imaging	82	10	Not reported
PainRhythms: Machine learning prediction of chronic pain from circadian dysregulation using actigraph data—a prelimiNot reportedry study	83	52	31
Predicting progression patterns of type 2 diabetes using multi-sensor measurements	84	54	6
Towards a telehealth infrastructure supported by machine learning on edge/fog for Parkinson’s movement screening	88	9	6
Early-Stage Risk Prediction of Non-Communicable Disease Using Machine Learning in Health CPS	90	736	17
Computer-Assisted Decision Support System in PulmoNot reportedry Cancer detection and stage classification on CT images	122	Not reported	Not reported
Monitoring stress with a wrist device using context	123	5	21
A sensor-based wrist pulse sigNot reportedl processing and lung cancer recognition	126	36	26
Prediction of venous thromboembolism using semantic and sentiment aNot reportedlyses of clinical Not reportedrratives	127	150	Not reported
